# Supplementary material
Source: publisher figshare collection journal article supplement (https://rs.figshare.com/ndownloader/files/17842709)
Supplement: Supplementary file 1 [file 17842709]

50	0.1	0.01	1	1	0.03	0.04	0.4	0.6	5	1	246.79	0.01765
50	0.1	0.2	1	1	0.03	0.04	0.4	0.2	5	1	269.43	0.02503
50	0.1	0.3	1	1	0.03	0.04	0.4	0.6	5	1	285.55	0.03017
50	0.2	0.1	1	1	0.03	0.04	0.4	0.6	5	1	260.59	0.01606
50	0.1	0.01	1	1	0.03	0.04	0.4	0.3	5	1	247	0.01666
50	0.1	0.01	1	1	0.03	0.04	0.4	0.2	5	1	247.51	0.01715
50	0.1	0.2	1	1	0.03	0.04	0.4	0.4	5	1	266.17	0.02352
50	0.01	0.1	1	1	0.03	0.04	0.4	0.4	5	1	247.42	0.02333
50	0.01	0.2	1	1	0.03	0.04	0.4	0	5	1	261.16	0.02842
50	0.2	0.01	1	1	0.03	0.04	0.4	0.5	5	1	249.93	0.0132
50	0.2	0.01	1	1	0.03	0.04	0.4	0.4	5	1	251.45	0.01292
50	0.1	0.1	1	1	0.03	0.04	0.4	0.4	5	1	251.72	0.01991
50	0.2	0.01	1	1	0.03	0.04	0.4	0.8	5	1	249.98	0.01322
50	0.01	0.1	1	1	0.03	0.04	0.4	0.6	5	1	249.58	0.02332
50	0.2	0.01	1	1	0.03	0.04	0.4	0.9	5	1	250.09	0.0128
50	0.01	0.1	1	1	0.03	0.04	0.4	0.3	5	1	250.22	0.0229
50	0.1	0.1	1	1	0.03	0.04	0.4	0.5	5	1	253.62	0.02005
50	0.01	0.1	1	1	0.03	0.04	0.4	0.5	5	1	251.67	0.02316
50	0.1	0.1	1	1	0.03	0.04	0.4	0.7	5	1	249.68	0.01927
50	0.1	0.1	1	1	0.03	0.04	0.4	0.6	5	1	250.08	0.0196
50	0.1	0.01	1	1	0.03	0.04	0.4	0.4	5	1	247.72	0.01715
50	0.1	0.2	1	1	0.03	0.04	0.4	0.7	5	1	266.6	0.0251
50	0.1	0.01	1	1	0.03	0.04	0.4	0.5	5	1	248.83	0.01715
50	0.01	0.1	1	1	0.03	0.04	0.4	0	5	1	251.9	0.02371
50	0.01	0.2	1	1	0.03	0.04	0.4	0.6	5	1	257.94	0.02898
50	0.3	0.01	1	1	0.03	0.04	0.4	0.8	5	1	261.96	0.00976
50	0.01	0.2	1	1	0.03	0.04	0.4	0.5	5	1	258.18	0.02777
50	0.1	0.2	1	1	0.03	0.04	0.4	0	5	1	263.34	0.02408
50	0.1	0.01	1	1	0.03	0.04	0.4	0.1	5	1	248.72	0.01768
50	0.1	0.01	1	1	0.03	0.04	0.4	0	5	1	253.46	0.0174
50	0.01	0.1	1	1	0.03	0.04	0.4	0.8	5	1	246.08	0.023
50	0.01	0.1	1	1	0.03	0.04	0.4	0.7	5	1	246.49	0.02287
50	0.01	0.1	1	1	0.03	0.04	0.4	0.2	5	1	246.95	0.02282
50	0.2	0.1	1	1	0.03	0.04	0.4	0.7	5	1	258.76	0.01548
50	0.01	0.2	1	1	0.03	0.04	0.4	0.9	5	1	262.71	0.02878
50	0.01	0.1	1	1	0.03	0.04	0.4	0.1	5	1	249.84	0.02317
50	0.2	0.01	1	1	0.03	0.04	0.4	0.2	5	1	251.25	0.01343
50	0.01	0.1	1	1	0.03	0.04	0.4	0.9	5	1	247.43	0.02279
50	0.1	0.1	1	1	0.03	0.04	0.4	0.9	5	1	249.01	0.01927
50	0.2	0.01	1	1	0.03	0.04	0.4	0.3	5	1	252.61	0.01395
50	0.1	0.2	1	1	0.03	0.04	0.4	0.1	5	1	267.87	0.02449
50	0.1	0.01	1	1	0.03	0.04	0.4	0.9	5	1	247.76	0.01763
50	0.1	0.1	1	1	0.03	0.04	0.4	0.8	5	1	251.54	0.0197
50	0.2	0.1	1	1	0.03	0.04	0.4	0.5	5	1	261.75	0.01633
50	0.2	0.1	1	1	0.03	0.04	0.4	0.4	5	1	262.42	0.01627
50	0.2	0.01	1	1	0.03	0.04	0.4	0.6	5	1	252.41	0.01371
50	0.2	0.01	1	1	0.03	0.04	0.4	0.7	5	1	253.43	0.01371
50	0.01	0.2	1	1	0.03	0.04	0.4	0.7	5	1	256.41	0.02791
50	0.01	0.2	1	1	0.03	0.04	0.4	0.2	5	1	254.88	0.02673
50	0.01	0.2	1	1	0.03	0.04	0.4	0.8	5	1	257.65	0.02797
50	0.2	0.2	1	1	0.03	0.04	0.4	0.4	5	1	276.2	0.02019
50	0.1	0.01	1	1	0.03	0.04	0.4	0.8	5	1	245.38	0.01668
50	0.2	0.1	1	1	0.03	0.04	0.4	0.1	5	1	263.44	0.01615
50	0.3	0.01	1	1	0.03	0.04	0.4	0.2	5	1	265.49	0.01039
50	0.3	0.01	1	1	0.03	0.04	0.4	0.3	5	1	265.82	0.01013
50	0.1	0.3	1	1	0.03	0.04	0.4	0.7	5	1	284.6	0.031
50	0.2	0.2	1	1	0.03	0.04	0.4	0.7	5	1	276.32	0.02026
50	0.3	0.3	1	1	0.03	0.04	0.4	0.2	5	1	313.18	0.02011
50	0.2	0.1	1	1	0.03	0.04	0.4	0	5	1	265.84	0.01601
50	0.1	0.01	1	1	0.03	0.04	0.4	0.7	5	1	247.63	0.01684
50	0.2	0.2	1	1	0.03	0.04	0.4	0.1	5	1	280.5	0.01991
50	0.01	0.2	1	1	0.03	0.04	0.4	0.1	5	1	259.04	0.02771
50	0.3	0.01	1	1	0.03	0.04	0.4	0.9	5	1	261.88	0.00978
50	0.01	0.3	1	1	0.03	0.04	0.4	0.2	5	1	278	0.03427
50	0.2	0.1	1	1	0.03	0.04	0.4	0.3	5	1	262.59	0.01604
50	0.3	0.3	1	1	0.03	0.04	0.4	0.7	5	1	318.69	0.02032
50	0.2	0.1	1	1	0.03	0.04	0.4	0.2	5	1	262.4	0.01607
50	0.01	0.3	1	1	0.03	0.04	0.4	0.3	5	1	275.56	0.0344
50	0.01	0.3	1	1	0.03	0.04	0.4	0.1	5	1	276.09	0.0343
50	0.3	0.1	1	1	0.03	0.04	0.4	0.1	5	1	276.28	0.01226
50	0.3	0.1	1	1	0.03	0.04	0.4	0.3	5	1	274.76	0.01205
50	0.3	0.3	1	1	0.03	0.04	0.4	0.1	5	1	316.87	0.0205
50	0.3	0.1	1	1	0.03	0.04	0.4	0.7	5	1	274.57	0.01211
50	0.3	0.1	1	1	0.03	0.04	0.4	0.6	5	1	275.15	0.01223
50	0.01	0.3	1	1	0.03	0.04	0.4	0	5	1	273.62	0.03392
50	0.3	0.1	1	1	0.03	0.04	0.4	0.2	5	1	279.33	0.01266
50	0.2	0.1	1	1	0.03	0.04	0.4	0.8	5	1	258.9	0.01569
50	0.3	0.1	1	1	0.03	0.04	0.4	0	5	1	274.14	0.01229
50	0.2	0.1	1	1	0.03	0.04	0.4	0.9	5	1	260.18	0.01587
50	0.3	0.01	1	1	0.03	0.04	0.4	0.6	5	1	263.63	0.00995
50	0.1	0.1	1	1	0.03	0.04	0.4	0.1	5	1	256.59	0.02041
50	0.3	0.01	1	1	0.03	0.04	0.4	0.7	5	1	265.2	0.00989
50	0.1	0.1	1	1	0.03	0.04	0.4	0	5	1	255.42	0.02103
50	0.01	0.3	1	1	0.03	0.04	0.4	0.5	5	1	279.14	0.03535
50	0.3	0.01	1	1	0.03	0.04	0.4	0.1	5	1	264.06	0.01006
50	0.01	0.3	1	1	0.03	0.04	0.4	0.4	5	1	281.04	0.0364
50	0.1	0.2	1	1	0.03	0.04	0.4	0.3	5	1	268.32	0.02401
50	0.01	0.3	1	1	0.03	0.04	0.4	0.7	5	1	275.79	0.03476
50	0.1	0.2	1	1	0.03	0.04	0.4	0.9	5	1	263.71	0.02434
50	0.2	0.2	1	1	0.03	0.04	0.4	0.8	5	1	280.64	0.02129
50	0.01	0.3	1	1	0.03	0.04	0.4	0.6	5	1	277.5	0.0349
50	0.3	0.01	1	1	0.03	0.04	0.4	0	5	1	271.1	0.01109
50	0.2	0.2	1	1	0.03	0.04	0.4	0	5	1	278.77	0.01969
50	0.3	0.2	1	1	0.03	0.04	0.4	0.9	5	1	289.22	0.01412
50	0.2	0.2	1	1	0.03	0.04	0.4	0.9	5	1	278.23	0.01999
50	0.3	0.1	1	1	0.03	0.04	0.4	0.5	5	1	273.07	0.01178
50	0.1	0.2	1	1	0.03	0.04	0.4	0.8	5	1	266.9	0.02497
50	0.2	0.2	1	1	0.03	0.04	0.4	0.2	5	1	276.66	0.01978
50	0.2	0.2	1	1	0.03	0.04	0.4	0.3	5	1	276.71	0.0202
50	0.3	0.1	1	1	0.03	0.04	0.4	0.4	5	1	273.97	0.01253
50	0.1	0.2	1	1	0.03	0.04	0.4	0.5	5	1	269.69	0.02492
50	0.2	0.2	1	1	0.03	0.04	0.4	0.6	5	1	277.28	0.0201
50	0.1	0.3	1	1	0.03	0.04	0.4	0	5	1	282.94	0.02993
50	0.1	0.3	1	1	0.03	0.04	0.4	0.1	5	1	284.87	0.03039
50	0.1	0.2	1	1	0.03	0.04	0.4	0.6	5	1	267.37	0.02367
50	0.3	0.2	1	1	0.03	0.04	0.4	0.1	5	1	290.7	0.01558
50	0.3	0.1	1	1	0.03	0.04	0.4	0.9	5	1	274.36	0.01139
50	0.3	0.1	1	1	0.03	0.04	0.4	0.8	5	1	275.51	0.01178
50	0.2	0.2	1	1	0.03	0.04	0.4	0.5	5	1	279.12	0.02031
50	0.1	0.3	1	1	0.03	0.04	0.4	0.8	5	1	284.51	0.03091
50	0.3	0.2	1	1	0.03	0.04	0.4	0.2	5	1	291.3	0.01516
50	0.1	0.3	1	1	0.03	0.04	0.4	0.9	5	1	284.33	0.03056
50	0.3	0.3	1	1	0.03	0.04	0.4	0	5	1	310.78	0.01938
50	0.01	0.01	1	1	0.03	0.04	0.4	0	5	1	313.37	0.0195
50	0.2	0.3	1	1	0.03	0.04	0.4	0	5	1	299.24	0.02485
50	0.01	0.3	1	1	0.03	0.04	0.4	0.8	5	1	276.96	0.03462
50	0.3	0.2	1	1	0.03	0.04	0.4	0.4	5	1	292.23	0.01616
50	0.3	0.2	1	1	0.03	0.04	0.4	0.3	5	1	292.85	0.01559
50	0.1	0.3	1	1	0.03	0.04	0.4	0.2	5	1	287.94	0.03088
50	0.1	0.3	1	1	0.03	0.04	0.4	0.3	5	1	288.27	0.03069
50	0.01	0.3	1	1	0.03	0.04	0.4	0.9	5	1	278.36	0.03593
50	0.1	0.3	1	1	0.03	0.04	0.4	0.5	5	1	287.78	0.03178
50	0.1	0.3	1	1	0.03	0.04	0.4	0.4	5	1	289.09	0.03096
50	0.2	0.3	1	1	0.03	0.04	0.4	0.9	5	1	298.28	0.02567
50	0.3	0.2	1	1	0.03	0.04	0.4	0.7	5	1	290.38	0.01487
50	0.3	0.2	1	1	0.03	0.04	0.4	0.5	5	1	290.26	0.01489
50	0.3	0.2	1	1	0.03	0.04	0.4	0.8	5	1	292.25	0.01531
50	0.3	0.2	1	1	0.03	0.04	0.4	0.6	5	1	291.19	0.01497
50	0.3	0.2	1	1	0.03	0.04	0.4	0	5	1	291.63	0.01554
50	0.01	0.01	1	1	0.03	0.04	0.4	0.9	5	1	320.23	0.0205
50	0.01	0.01	1	1	0.03	0.04	0.4	0.2	5	1	314.66	0.02027
50	0.01	0.01	1	1	0.03	0.04	0.4	0.6	5	1	311.34	0.02031
50	0.01	0.01	1	1	0.03	0.04	0.4	0.5	5	1	313.38	0.01967
50	0.3	0.3	1	1	0.03	0.04	0.4	0.9	5	1	311.51	0.01936
50	0.01	0.01	1	1	0.03	0.04	0.4	0.8	5	1	313.82	0.01955
50	0.01	0.01	1	1	0.03	0.04	0.4	0.7	5	1	314.73	0.01961
50	0.01	0.01	1	1	0.03	0.04	0.4	0.1	5	1	323.82	0.02048
50	0.3	0.01	1	1	0.03	0.04	0.4	0.4	5	1	260.95	0.00976
50	0.2	0.3	1	1	0.03	0.04	0.4	0.2	5	1	298.3	0.02581
50	0.2	0.3	1	1	0.03	0.04	0.4	0.5	5	1	302.49	0.02696
50	0.2	0.3	1	1	0.03	0.04	0.4	0.8	5	1	301.62	0.02587
50	0.2	0.3	1	1	0.03	0.04	0.4	0.6	5	1	301.44	0.02549
50	0.2	0.3	1	1	0.03	0.04	0.4	0.4	5	1	301.04	0.02607
50	0.2	0.3	1	1	0.03	0.04	0.4	0.1	5	1	301.82	0.02588
50	0.3	0.01	1	1	0.03	0.04	0.4	0.5	5	1	266.55	0.01049
50	0.2	0.3	1	1	0.03	0.04	0.4	0.7	5	1	305.98	0.02658
50	0.01	0.01	1	1	0.03	0.04	0.4	0.4	5	1	315.88	0.01964
50	0.2	0.3	1	1	0.03	0.04	0.4	0.3	5	1	298.69	0.0259
50	0.3	0.3	1	1	0.03	0.04	0.4	0.4	5	1	312.77	0.02032
50	0.3	0.3	1	1	0.03	0.04	0.4	0.6	5	1	315.1	0.01961
50	0.3	0.3	1	1	0.03	0.04	0.4	0.5	5	1	316.45	0.02105
50	0.3	0.3	1	1	0.03	0.04	0.4	0.3	5	1	317.51	0.02085
50	0.01	0.01	1	1	0.03	0.04	0.4	0.3	5	1	321.43	0.02034
50	0.2	0.01	1	1	0.03	0.04	0.4	0.1	5	1	251.53	0.01356
50	0.1	0.1	1	1	0.03	0.04	0.4	0.2	5	1	248.89	0.01938
50	0.2	0.01	1	1	0.03	0.04	0.4	0	5	1	255.1	0.0138
50	0.1	0.1	1	1	0.03	0.04	0.4	0.3	5	1	250.9	0.0196
50	0.01	0.2	1	1	0.03	0.04	0.4	0.3	5	1	258.04	0.0281
50	0.01	0.2	1	1	0.03	0.04	0.4	0.4	5	1	261.11	0.0288
50	0.3	0.3	1	1	0.03	0.04	0.4	0.8	5	1	313.05	0.01996
